# Supplementary material for: Subclass-switched anti-spike IgG3 oligoclonal cocktails strongly enhance Fc-mediated opsonization
Source: PubMed Central journal article supplement — Proc Natl Acad Sci U S A. 2023 Apr 3;120(15):e2217590120. doi: 10.1073/pnas.2217590120 (PMC10104557; doi:10.1073/pnas.2217590120), 2023-04-03
Supplement: pnas.2217590120.sapp2.pdf [file pnas.2217590120.sapp2.pdf]

## Expression plasmid sequences

### Empty vector for IgG1 constant domain>

GCTTCCACCAAGGGCCCCTCTGTTTTCCCATTTGGCTCCTTCATCAAAGTCTACAAGCGGCGGCAC  
CGCTGCTCTAGGATGTCTCGTCAAAGACTACTTCCCTGAACCTGTTACAGTGAGCTGGAACAGTG  
GCGCGCTAACGTCTGGAGTGACACATTCCCAGCTGTGCTGCAGAGTTCTGGCCTGTATTCTCT  
GTCTAGCGTGGTGACAGTGCCTTCCAGTTCCTCGGTACGCAGACTTACATTTGCAACGTA AAC  
ACAAACCCTCAAACACAAAAGTGGATAAGAAGGTTGAGCCTAAATCTTGCGATAAGACACACACA  
TGCCCCCATGCCCAGCTCCTGAGCTGCTAGGGGGGCCATCCGTCTTTCTGTTTCCTCCTAAAC  
CAAAGACACACTCATGATCTCCCGGACCCAGAGGTAACCTGCGTGGTGGTGGACGTGTCTCA  
TGAAGACCCAGAGGTGAAGTTCAACTGGTATGTCGATGGAGTCGAGGTACATAACGCAAAGACTA  
AACCCAGGGAAGAGCAGTACAACAGCACCTACCGTGTTGTGTCTGTGCTGACTGTGCTCCACCA  
GGACTGGCTCAACGGCAAGGAATATAAATGCAAAGTCTCCAATAAGGCACTACCCGCGCCCATT  
GAGAAAACCATCTCTAAGGCAAAGGGCAACCACGCGAGCCTCAGGTTTACACTCTGCCCCCA  
GCAGGGAAGAGATGACTAAGAATCAGGTTTCCCTGACATGTCTCGTGAAGGGCTTTTACCCATCG  
GATATTGCCGTCAATGGGAGAGTAACGGACAGCCCGAGAATAATTACAAGACTACACCCCCCG  
TACTCGACTCCGATGGAAGCTTTTTCTGTACTCCAAGCTGACCGTTGACAAGAGCCGCTGGCAA  
CAAGGCAATGTGTTCTCTTGACGTGTAATGCACGAGGCCCTCCATAATCACTACACCCAGAAGTC  
ACTGAGTTTATCCCCCGGTAGTCTAGAAGTTGTCTCCTCCTGCACTGACTGACTGATACAATCG  
ATTTCTGGATCCGCAGGCCTAATCAACCTCTGGATTACAAAATTTGTGAAAGATTGACTGGTATTC  
TTAACTATGTTGCTCCTTTTACGCTATGTGGATACGCTGCTTTAATGCCTTTGTATCATGCTATTGC  
TTCCCGTATGGCTTTTCAATTTCTCCTCCTTGATAAATCCTGGTTGCTGTCTCTTTATGAGGAGTTG  
TGGCCCGTTGTCAGGCAACGTGGCGTGGTGTGCACTGTGTTTGTGACGCAACCCCCACTGGTT  
GGGGCATTGCCACCACCTGTCAGCTCCTTTCCGGGACTTTCCGTTTTCCCCTCCCTATTGCCACG  
GCGGAACCATCGCCGCTGCCTTGCCCGCTGCTGGACAGGGGCTCGGCTGTTGGGCACTGAC  
AATTCGTTGGTGTGTCGGGGAAGCTGACGTCCTTTCCATGGCTGCTCGCCTGTGTTGCCACCT  
GGATTCTGCGCGGGACGTCCTTCTGCTACGTCCTTTCCGCCCTCAATCCAGCGGACCTTCTTCC  
CCGCGGCTGCTGCCGGCTCTGCCGCTCTTCCGCGTCTTCCGCTTCCGCCCTCAGACGAGTCG  
GATCTCCCTTTGGGCCGCTCCCGCCTGTCTAGCTTACTGACTGAGTACAGCGTACCTTCAG  
CTCACAGACATGATAAGATACATTGATGAGTTTGGACAAACCACAAGTGAATGCAGTGA AAAAAA  
TGCTTTATTTGTGAAATTTGTGATGCTATTGCTTTATTTGTAACCATTATAAGCTGCAATAACAAG  
TTAAACAACAATTGCATTCATTTTATGTTTCAGGTTCAAGGGGAGGTGTGGGAGGTTTTTTAA  
GCAAGTAAAACCTACAAATGTGGTATTGGCCCATCTCTATCGGTATCGTAGCATAACCCCTTG  
GGCCTCTAAACGGTCTTGAGGGTTTTTTGTGCCCTCGGGCGGATTGCTATCTACCGGCA  
TTGGCGCAGAAAAAATGCCTGATGCGACGCTGCGCGTCTTATACTCCACATATGCCAGTTCA  
GCAACGGATACGGCTTCCCAACTTGCCCACTTCCATACGTGTCTCCTTACCAGAAATTTATCCT  
TAAGGTCGTCAGCTATCCTGCAGGCGATCTCTCGATTTGATCAAGACATTCTTTAATGGTCTTT  
TCTGGACACCACTAGGGGTCAGAAGTAGTTCATCAAACCTTTCTTCCCTCCCTAATCTCATTGGTTA  
CCTTGGGCTATCGAACTTAATTAAGCGATCTGCATCTCAATTAGTCAGCAACCATAGTCCCGCC  
CCTAACTCCGCCCATCCCGCCCTAACTCCGCCAGTTCCGCCATTCTCCGCCCATCGCTGA  
CTAATTTTTTTTTATTTATGCAGAGGCCGAGGCCGCTCGGCCTCTGAGCTATTCCAGAAGTAGTG  
AGGAGGCTTTTTTGGAGGCCTAGGCTTTTCAAAGGAGGTAGCCAACATGATTGAACAAGATGGA  
TTGCACGCAGTTCTCCCGCCGCTTGGGTGGAGAGGCTATTCCGGCTATGACTGGGCACAACAGA  
CAATCGGCTGCTCTGATGCCGCCGTGTTCCGGCTGTCAGCGCAGGGGCGCCCGTTCTTTTTGT  
CAAGACCGACCTGTCCGGTGCCTGAATGAACTCCAGGACGAGGCAGCGCGGCTATCGTGGCT  
GGCCACGACGGGCGTTCTTGCGCAGCTGTGCTCGACGTTGTCACTGAAGCGGGAAGGGACTG  
GCTGCTATTGGGCGAAGTGCCGGGGCAGGATCTCCTGTCATCTCACCTTGCTCCTGCCGAGAAA  
GTATCCATCATGGCTGATGCAATGCGGCGGCTGCATACGCTTGATCCGGCTACCTGCCATTCCG  
ACCACCAAGCGAAACATCGCATCGAGCGAGCACGTA CTGGATGGAAGCCGGTCTTGTGATCA  
GGATGATCTGGACGAAGAGCATCAGGGGCTCGCGCCAGCCGAACCTGTTCCGCCAGGCTCAAGGC  
GCGGATGCCCGACGGCGAGGATCTCGTCTGACCCACGGCGATGCCTGCTTGCCGAATATCAT  
GGTGGAAAATGGCCGCTTTTCTGGATTCATCGACTGTGGCCGGCTGGGTGTGGCGGACCGCTAT  
CAGGACATAGCGTTGGCTACCCGTGATATTGCTGAAGAGCTTGGCGGCGAATGGGCTGACCGCT  
TCCTCGTGCTTTACGGTATCGCCGCTCCCGATTGCGAGCGCATCGCCTTCTATCGCCTTCTTGAC  
GAGTTCTTCTAGTATGTAAGCCCTGTGCCCTTCTAGTTGCCAGCCATCTGTTGTTTGCCCTCC  
CGTGCCCTTCTTGACCTGGAAGGTGCCACTCCCACTGTCCTTTTCTAATAAAAATGAGAAATTTG  
CATCGCATCTTGAGTAGGTGTCATTCTATTCTGGGGGTGGGGTGGGCGAGGACAGCAAGGG  
GGAGGATTGGGAAGACAATAGCAGGCATCTGGGATGCGGTGGGCTCTATGGTTAATTAACCA  
GTCAAGTCAGCTACTTGCGGAGATCGACTTGTCTGGGTTTCTGACTACGCTCAGAATTGCGTCAGT

CAAGTTCGATCTGGTCCTTGCTATTGCACCCGTTCTCCGATTACGAGTTTCATTTAAATCATGTGA  
GCAAAGGCCAGCAAAGGCCAGGAACCGTAAAAAGGCCGCGTTGCTGGCGTTTTTCCATAGGC  
TCCGCCCCCTGACGAGCATCAAAAAATCGACGCTCAAGTCAGAGGTGGCGAAACCCGACAGG  
ACTATAAAGATAACCAGGCGTTTCCCCCTGGAAGCTCCCTCGTGCCTCTCCTGTTCCGACCCTGC  
CGCTTACCGGATACCTGTCCGCTTTCTCCCTTCGGGAAGCGTGGCGCTTTCTCATAGCTCACGC  
TGTAGGTATCTCAGTTCGGTGTAGGTCGTTCCGCTCAAGCTGGGCTGTGTGCACGAACCCCCCG  
TTCAGCCCGACCGCTGCGCCTTATCCGGTAACTATCGTCTTGAGTCCAACCCGGTAAGACACGA  
CTTATCGCCACTGGCAGCAGCCACTGGTAACAGGATTAGCAGAGCGAGGTATGTAGGCGGTGCT  
ACAGAGTTCTTGAAGTGGTGGCCTAACTACGGCTACACTAGAAGAACAGTATTTGGTATCTGCGC  
TCTGCTGAAGCCAGTTACCTTCGGAAAAAGAGTTGGTAGCTCTTGATCCGGCAAACAAACCACCG  
CTGGTAGCGGTGTTTTTTTTGTTTGCAAGCAGCAGATTACGCGCAGAAAAAAGGATCTCAAGAA  
GATCCTTTGATCTTTTCTACGGGGTCTGACGCTCAGTGGAAACGAAAACTCACGTTAAGGATTTT  
GGTCATGAGATTATCAAAAAGGATCTTACCTAGATCCTTTTTAAATTAATAAATGAAGTTTTAAATCA  
ATCTAAAGTATATATGAGTAACTTGGTCTGACAGTTACCAATGCTTAATCAGTGAGGCACCTATC  
TCAGCGATCTGTCTATTTCTGTTTCATCCATAGTTGCATTTAAATTTCCGAACCTCTCAAGGCCCTCG  
TCGGAAAATCTTCAAACCTTTCGTCGGATCCATCTTGACAGGCTACCTCTCGAACGAACCTATCGCAA  
GTCTCTTGGCCGGCCTTGCGCCTTGGCTATTGCTTGGCAGCGCCTATCGCCAGGTATTACTCCAA  
TCCCGAATATCCGAGATCGGGATCACCCGAGAGAAGTTCAACCTACATCCTCAATCCCGATCTAT  
CCGAGATCCGAGGAATATCGAAATCGGGGCGCGCCTGGTGTACCGAGAACGATCCTCTCAGTGC  
GAGTCTCGACGATCCATATCGTTGCTTGGCAGTCAGCCAGTCGGAATCCAGCTTGGGACCCAGG  
AAGTCCAATCGTCAGATATTGTAATCAAGCCTGGTCACGGCAGCGTACCGATCTGTTTAAACCTA  
GATATTGATAGTCTGATCGGTCAACGTATAATCGAGTCCTAGCTTTTGCAAACATCTATCAAGAGA  
CAGGATCAGCAGGAGGCTTTCGCATGAGTATTCAACATTTCCGTGTGCGCCTTATTCCCTTTTTTG  
CGGCATTTTGCCTTCTGTTTTGCTCACCCAGAAACGCTGGTGAAGTAAAAGATGCTGAAGAT  
CAGTTGGGTGCGCGAGTGGGTTACATCGAACTGGATCTCAACAGCGGTAAGATCCTTGAGAGTT  
TTCGCCCCGAAGAACGCTTTCCAATGATGAGCACTTTTAAAGTTCTGCTATGTGGCGCGGTATTAT  
CCCGTATTGACGCCGGGCAAGAGCAACTCGGTCGCCGCATACACTATTCTCAGAATGACTTGGTT  
GAGTATTCACCAGTCACAGAAAAGCATCTTACGGATGGCATGACAGTAAGAGAATTATGCAGTGC  
TGCCATAACCATGAGTGATAACACTGCGGCCAACTTACTTCTGACAACGATTGGAGGACCGAAGG  
AGCTAACCGCTTTTTTGCACAACATGGGGGATCATGTAACCTGCCTTGATCGTTGGGAACCGGAG  
CTGAATGAAGCCATACCAAACGACGAGCGTGACACCACGATGCCTGTAGCAATGGCAACAACCT  
TGCGTAAACTATTAAGTGGCGAACTACTTACTCTAGCTTCCCGGCAACAGTTGATAGACTGGATG  
GAGGCGGATAAAGTTGCAGGACCCTTCTGCGCTCGGCCCTTCCGGCTGGCTGGTTTATTGCTG  
ATAAATCTGGAGCCGGTGGCGTGGTCTCGCGGTATCATTGCAGCACTGGGGCCAGATGGTAA  
GCCCTCCCGTATCGTAGTTATCTACACGACGGGGAGTCAGGCAACTATGGATGAACGAAATAGA  
CAGATCGCTGAGATAGGTGCCTCACTGATTAAGCATTGGTAACCGATTCTAGGTGCATTGGCGCA  
GAAAAAATGCCTGATGCGACGCTGCGCGTCTTATACTCCACATATGCCAGATTCAGCAACGGA  
TACGGCTTCCCAACTTGCCCACTTCCATACGTGTCTCTTACCAGAAATTTATCCTTAAGATCG  
TTTTAACTCGACTCTGGCTCTATCGAATCTCCGTGTTTTGAGCTTACGCGAACAGCCGTGGCGC  
TCATTTGCTCGTCGGGCATCGAATCTCGTCAGCTATCGTCAGCTTACCTTTTTGGCAGCGATCGC  
GGCTCCCGACATCTTGGACCATTAGCTCCACAGGTATCTTCTCCCTCTAGTGGTCATAACAGCA  
GCTTCAGCTACCTCTCAATTCAAAAACCCCTCAAGACCCGTTTAGAGGCCCAAGGGGTTATGC  
TATCAATCGTTGCGTTACACACACAAAAACCAACACACATCCATCTTCGATGGATAGCGATTTTA  
TTATCTAACTGCTGATCGAGTGTAGCCAGATCTAGTAATCAATTACGGGGTCAATTAGTTCATAGCC  
CATATATGGAGTTCCGCGTTACATAACTTACGGTAAATGGCCCGCCTGGCTGACCGCCCAACGAC  
CCCCGCCATTGACGTCAATAATGACGTATGTTCCCATAGTAACGCCAATAGGGACTTTCCATTG  
ACGTCAATGGGTGGAGTATTTACGGTAACTGCCCACTTGGCAGTACATCAAGTGTATCATATGC  
CAAGTACGCCCCCTATTGACGTCAATGACGGTAAATGGCCCGCCTGGCATTATGCCAGTACATG  
ACCTTATGGGACTTTCTACTTGGCAGTACATCTACGTATTAGTCATCGCTATTACCATGCTGATG  
CGGTTTTGGCAGTACATCAATGGGCGTGGATAGCGGTTTGACTCACGGGGATTTCCAAGTCTCCA  
CCCCATTGACGTCAATGGGAGTTTGTTTTGGCACCAAATCAACGGGACTTTCCAAAATGTCGTA  
ACAACCTCCGCCCCATTGACGCAAATGGGCGGTAGGCGTGTACGGTGGGAGGTCTATATAAGCAG  
AGCTGGTTTGTGAACCGTCAGATCGCTGGAGACGCCATCCACGCTGTTTTGACCTCCATAGAA  
GACACCGGGACCGATCCAGCCTCCCTCGAAGCTTACATGTGGTACCGAGCTCGGATCCTGAGA  
ACTTCAGGGTGGTCTATGGGACCCTTGTGTTTTCTTTCCCTTCTTTTCTATGGTTAAGTTTCAT  
GTCATAGGAAAGGGGAGAAGTAACAGGGTACACATATTGACCAAATCAGGGTAATTTTGCATTTGT  
AATTTTTAAAAATGCTTTCTTCTTTTAAATATACTTTTTGTTTATCTTATTTCTAATAACTTTCCCTAAT  
CTTTTCTTTTTCAGGCAATAATGATAACATGTATTCATGCCTCTTTGCACCATTCTAAGGAATAACAG  
TGATAATTTCTGGGTTAAGGCAATAGCAATATTTCTGCATATAAATATTTCTGCATATAAATGTAA  
CTGATGTAAGAGGTTTCATATTGCTAATAGCAGCTACAATCCAGCTACCATTCTGCTTTTTATTTAT

GGTTGGGATAAGGCTGGATTATTCTGAGTCCAAGCTAGGCCCTTTTGCTAATCATGTTTCATACCTC  
TTATCTTCCCTCCCACAGCTCCTGGGCAACGTGCTGGTCTGTGTGCTGGCCATCACTTTGGCAA  
GGCGGCCGC

### **Lambda Light chain expression plasmid sequence>**

GCCACCATGGGATGGTCATGTATCATCCTTTTTCTAGTAGCAACTGCAACCGGTGTACATTCTGA  
CATCCAGATGACCCAATCTCCTTCCACCCTGTCTGCATCTGTAGGAGACAGAGTCACCATCACTT  
GCCGGGCCAGTCAGAGTATTAGTAGCTGGTTGGCCTGGTATCAGCAGAAACCAGGGAAAGCCCC  
TAAGCTCCTGATCTATAAGGCATCTAGTTTAGAAAGTGGGGTCCCATCAAGGTTTCAGCGCAGTG  
GATCTGGGACAGACTTCACTCTCACCATCAGCAGCCTGCAGCCTGATGATTTTGCAACTTATTACT  
GTCAACACTATAATAGTTATTGGGGGTACACTTTTTGGCCAGGGGACCAAGCTGGAGATCAAAGGC  
CAGCCCAAGGCAGCCCCATCCGTTACCCTGTTTCCCCCATCCTCCGAAGAATTGCAGGCAAATAA  
AGCTACCCTGGTGTGCCTTATCTCCGATTTTTACCCCGGGGCCGTGACTGTGGCATGGAAGGCA  
GATTCTTCGCCTGTGAAGGCTGGTGTGAAACAACCACACCCTCCAAGCAAAGCAACAACAAGTA  
CGCAGCCAGCTCCTATCTGTCCCTGACCCCGGAACAATGGAAGTCTCATAGGTCCTACAGCTGT  
CAGGTCACACATGAGGGCTCCACAGTGGAGAAAACAGTGGCTCCAACAGAGTGTAGTTAGTCTA  
GAAGTTGTCTCCTCCTGCACTGACTGACTGATACAATCGATTTCTGGATCCGCAGGCCTAATCAA  
CCTCTGGATTACAAAATTTGTGAAAGATTGACTGGTATTCTTAACTATGTTGCTCCTTTTACGCTAT  
GTGGATACGCTGCTTTAATGCCTTTGTATCATGCTATTGCTTCCCGTATGGCTTTCATTTTCTCCTC  
CTTGATAAATCCTGGTTGCTGTCTTTATGAGGAGTTGTGGCCCGTTGTCAGGCAACGTGGCG  
TGGTGTGCACTGTGTTGCTGACGCAACCCCACTGGTTGGGGCATTGCCACCACCTGTCAGCT  
CCTTTCCGGGACTTTTCGCTTTCCCCCTCCCTATTGCCACGGCCGGAACCTCATCGCCGCTGCCTTG  
CCCGCTGCTGGACAGGGGCTCGGCTGTTGGGCACTGACAATTCCGTGGTGTGTCGGGGAAGC  
TGACGTCCCTTCCATGGCTGCTCGCCTGTGTTGCCACCTGGATTCTGCGCGGGACGTCCCTTCTG  
CTACGTCCCTTCGGCCCTCAATCCAGCGGACCTTCCCTCCCGCGGCCTGCTGCCGGCTCTGCGG  
CCTCTTCCGCGTCTTTCGCTTCCGCTCAGACGAGTCGGATCTCCCTTTGGGCCGCTCCCGC  
CTGTCTAGCTTGACTGACTGAGATACAGCGTACCTTCAGCTCACAGACATGATAAGATACATTGAT  
GAGTTTGACAAAACCACAACACTAGAATGCAGTGAATAAAGTAAACAAACAACAATTGCATTCATTTTAT  
ATGCTTTATTTGTAACCATATAAGCTGCAATAAACAAGTTAACAACAACAATTGCATTCATTTTAT  
GTTTCAGGTTTCAGGGGAGGTGTGGGAGGTTTTTAAAGCAAGTAAACCTGTACAAATGTGGTA  
TTGGCCCATCTCTATCGGTATCGTAGCATAACCCCTTGGGGCCTCTAACCGGTCTTGAGGGGTT  
TTTTGTGCCCTCGGGCCGATTGCTATCTACCGGCATTGGCGCAGAAAAAATGCCTGATGCG  
ACGCTGCGCGTCTTATACTCCACATATGCCAGATTTCAGCAACGGATACGGCTTCCCAACTTGC  
CCACTTCCATACGTGTCCTCCTTACCAGAAATTTATCCTTAAGGTCGTCAGCTATCCTGCAGGCGA  
TCTCTGATTTTCGATCAAGACATTCTTTAATGGTCTTTTCTGGACACCACTAGGGGTCAGAAGTA  
GTTTCATCAAACCTTCTTCCCTCCCTAATCTCATTGGTTACCTTGGGCTATCGAACTTAATTAAGCG  
ATCTGCATCTCAATTAGTCAGCAACCATAGTCCCGCCCTAACTCCGCCATCCCGCCCCTAACT  
CCGCCAGTCCGCCATTCTCCGCCCATCGCTGACTAATTTTTTTTATTTATGCAGAGGCCGA  
GGCCGCTCGGCCTCTGAGCTATTCCAGAAGTAGTGAGGAGGCTTTTTTGGAGGCCTAGGCTTT  
TGCAAAGGAGGTAGCCAACATGATTGAACAAGATGGATTGCACGCAGGTTCTCCCGCCGCTTGG  
GTGGAGAGGCTATTCCGCTATGACTGGGCACAACAGACAATCGGCTGCTCTGATGCCGCCGTGT  
TCCGGCTGTCAGCGCAGGGGCGCCCGGTTCTTTTGTCAAGACCGACCTGTCCGGTGCCTGAA  
TGAACTCCAGGACGAGGCAGCGCGGCTATCGTGGCTGGCCACGACGGGCGTTCTTGCAGCAGC  
TGTGCTCGACGTTGCACTGAAGCGGGAAGGGACTGGCTGCTATTGGGCGAAGTGCCGGGGCA  
GGATCTCCTGTATCTCACCTTGTCTCCTGCCGAGAAAGTATCCATCATGGCTGATGCAATGCGGC  
GGCTGCATACGCTTGTCCGGCTACCTGCCATTCCGACCACCAAGCGAAACATCGCATCGAGCG  
AGCACGTAATCGGATGGAAGCCGGTCTTGTGATCAGGATGATCTGGACGAAGAGCATCAGGGG  
CTCGCGCCAGCCGAACCTGTTCCGCAAGGCTCAAGGCGCGGATGCCCGACGGCGAGGATCTCGTC  
GTGACCCACGGCGATGCCTGCTTCCGGAATATCATGGTGGAAAATGGCCGCTTTTCTGGATTCT  
CGACTGTGGCCGGCTGGGTGTGGCGGACCGCTATCAGGACATAGCGTTGGCTACCCGTGATATT  
GCTGAAGAGCTTGGCGGCGAATGGGCTGACCGCTTCTCGTCTTTACGGTATCCCGCTCCCG  
ATTCGACGCGCATCGCTTTCTATCGCTTCTTACGAGTCTTCTAGTATGTAAGCCCTGTGCCCTT  
CTAGTTGCCAGCCATCTGTTGTTTCCCTTCCCGCGTCCCTTCTTACCCTGGAAGGTGCCCT  
CCTACTGTCTTTTCTAATAAAATGAGGAAATGCATCGCATTGTCTGAGTAGGTGTCATTCTATT  
CTGGGGGTGGGGTGGGGCAGGACAGCAAGGGGAGGATTGGGAAGACAATAGCAGGCATGC  
TGGGGATGCGGTGGGCTCTATGGTTAATTAACCAGTCAAGTCAGCTACTTGGCGAGATCGACTTG

TCTGGGTTTTCGACTACGCTCAGAATTGCGTCAGTCAAGTTGATCTGGTCCTTGCTATTGCACCC  
GTTCTCCGATTACGAGTTTCATTTAAATCATGTGAGCAAAAGGCCAGCAAAAGGCCAGGAACCGT  
AAAAAGGCCGCGTTGCTGGCGTTTTTCCATAGGCTCCGCCCCCTGACGAGCATCACAAAAATC  
GACGCTCAAGTCAGAGGTGGCGAAACCCGACAGGACTATAAAGATACCAGGCGTTTTCCCCCTGG  
AAGTCCCTCGTGCCTCTCTGTTCCGACCCTGCCGTTACCGGATACCTGTCCGCTTTTCTCC  
CTTCGGGAAGCGTGGCGCTTCTCATAGCTCACGCTGTAGGTATCTCAGTTCGGTGTAGGTCGTT  
CGCTCCAAGCTGGGCTGTGTGCACGAACCCCCGTTACGCCGACCGCTGCGCCTTATCCGGTA  
ACTATCGTCTTGAGTCCAACCCGGTAAGACACGACTTATCGCCACTGGCAGCAGCCACTGGTAAC  
AGGATTAGCAGAGCGAGGTATGTAGGCGGTGCTACAGAGTTCTTGAAGTGGTGGCCTAACTACG  
GCTACACTAGAAGACAGTATTTGGTATCTGCGCTCTGCTGAAGCCAGTTACCTTCGGAAAAAGA  
GTTTGGTAGCTCTTGATCCGGCAAAACAAACCCGCTGGTAGCGGTGGTTTTTTTTGTTTGAAGCA  
GCAGATTACGCGCAGAAAAAAGGATCTCAAGAAGATCCTTTGATCTTTTTCTACGGGGTCTGACG  
CTCAGTGGAAACGAAAACCTCACGTTAAGGGATTTTGGTTCATGAGATTATCAAAAAGGATCTTACCT  
AGATCCTTTTAAATTAATAAAGTAAAAATCAATCTAAAGTATATATGAGTAAACTTGGTCTGA  
CAGTTACCAATGCTTAATCAGTGAGGCACCTATCTCAGCGATCTGTCTATTTTCGTTCCATCATAGT  
TGCATTTAAATTTCCGAACCTCTCCAAGGCCCTCGTCGGAAAAATCTTCAAACCTTTTCGTCGGATCCA  
TCTTGCAGGCTACCTCTCGAACGAACCTATCGCAAGTCTCTTGGCCGGCCTTGCCTTGGCTATT  
GCTTGGCAGCGCCTATCGCCAGGTATTACTCCAATCCCGAATATCCGAGATCCGGGATCACCCGA  
GAGAAGTTCAACCTACATCCTCAATCCCGATCTATCCGAGATCCGAGGAATATCGAAATCGGGGC  
GCGCCTGGTGTACCGAGAACGATCCTCTCAGTGCAGTCTCGACGATCCATATCGTTGCTTGGC  
AGTCAGCCAGTCGGAATCCAGCTTGGGACCCAGGAAGTCCAATCGTCAGATATTGACTCAAGC  
CTGGTCACGGCAGCGTACCGATCTGTTTAAACCTAGATATTGATAGTCTGATCGGTCAACGTATA  
ATCGAGTCTAGCTTTTGAACATCTATCAAGAGACAGGATCAGCAGGAGGCTTTTCGCATGAGT  
ATTCAACATTTCCGTGTGCGCCTTATTCCCTTTTTTTCGGCATTTCCTTCTGTTTTTGTCCACC  
CAGAAACGCTGGTAAAGTAAAGATGCTGAAGATCAGTTGGGTGCGCGAGTGGGTTACATCGA  
ACTGGATCTCAACAGCGGTAAGATCCTTGAGAGTTTTTCGCCCGAAGAACGCTTTCCAATGATGA  
GCACTTTTAAAGTTCTGCTATGTGGCGCGGTATTATCCCGTATTGACGCCGGGCAAGAGCAACTC  
GGTCGCCGCATACACTATTCTCAGAATGACTTGGTTGAGTATTCACCAGTCACAGAAAAGCATCTT  
ACGGATGGCATGACAGTAAGAGAATTATGCAGTGTGCCATAACCATGAGTGATAACACTGCGGC  
CAACTTACTTCTGACAACGATTGGAGGACCGAAGGAGCTAACCGCTTTTTTGCACAACATGGGGG  
ATCATGTAACCTCGCCTTGATCGTTGGGAACCGGAGCTGAATGAAGCCATACCAAACGACGAGCG  
TGACACCACGATGCCTGTAGCAATGGCAACAACCTTGCCTAACTATTAAGTGGCGAACTACTTA  
CTCTAGCTTCCCGGCAACAGTTGATAGACTGGATGGAGGCGGATAAAGTTGCAGGACCCTTCT  
GCGCTCGGCCCTTCCGGCTGGCTGGTTTTATTGCTGATAAATCTGGAGCCGGTGGAGCGTGGTCT  
CGCGGTACTTGCAGCACTGGGCGCAGATGGTAAGCCCTCCCGTATCGTAGTTATCTACACGA  
CGGGGAGTCAGGCAACTATGGATGAACGAAATAGACAGATCGCTGAGATAGGTGCCTCACTGAT  
TAAGCATTGGTAACCGATTCTAGGTGCATTGGCGCAGAAAAAATGCCTGATGCGACGCTGCGC  
GTCTTATACTCCACATATGCCAGATTCAGCAACGGATACGGCTTCCCAACTTGCCCACTTCCA  
TACGTGTCTCCTTACCAGAAATTTATCCTTAAGATCGTTTAAACTCGACTCTGGCTCTATCGAAT  
CTCCGTGCTTTTCGAGCTTACGCGAACAGCCGTGGCGCTCATTGCTCGTCGGGCATCGAATCTC  
GTCAGCTATCGTCAGCTTACCTTTTTGGCAGCGATCGCGGCTCCCGACATCTTGGACCATTAGCT  
CCACAGGTATCTTCTTCCCTCTAGTGGTCATAACAGCAGCTTCAGCTACCTCTCAATTCAAAAAAC  
CCCTCAAGACCCGTTTAGAGGCCCAAGGGGTTATGCTATCAATCGTTGCGTTACACACACAAAA  
AACCAACACACATCCATCTTCGATGGATAGCGATTTTATTATCTAACTGCTGATCGAGTGTAGCCA  
GATCTAGTAATCAATTACGGGGTCAATTAGTTCATAGCCCATATATGGAGTTCGCGTTACATAACT  
TACGGTAAATGGCCCGCCTGGCTGACCGCCCAACGACCCCGCCATTGACGTCAATAATGACG  
TATGTTCCCATAGTAACGCCAATAGGGACTTTCCATTGACGTCAATGGGTGGAGTATTTACGGTAA  
ACTGCCCACTTGGCAGTACATCAAGTGTATCATATGCCAAGTACGCCCCCTATTGACGTCAATGA  
CGGTAAATGGCCCGCCTGGCATTATGCCCAGTACATGACCTTATGGGACTTTCTACTTGGCAGT  
ACATCTACGTATTAGTCATCGCTATTACCATGCTGATGCGGTTTTGGCAGTACATCAATGGGCGT  
GGATAGCGGTTTTGACTCACGGGGATTTCCAAGTCTCCACCCATTGACGTCAATGGGAGTTTTGTT  
TTGGCACCAAAATCAACGGGACTTTCCAAAATGTGCTAACAACCTCCGCCCATGACGCAAATGG  
GCGGTAGGCGTGTACGGTGGGAGGTCTATATAAGCAGAGCTGGTTTAGTGAACCGTCAGATCGC  
CTGGAGACGCCATCCACGCTGTTTTGACCTCCATAGAAGACACCGGGACCGATCCAGCCTCCCC  
TCGAAGCTTACATGTGGTACCGAGCTCGGATCCTGAGAACTTCAGGGTGAAGTCTATGGGACCCTT  
GATGTTTTTCCCCTTCTTTTCTATGGTTAAGTTTCATGTCATAGGAAGGGGAGAAGTAAACAGG  
TACACATATTGACCAAAATCAGGGTAATTTTGCATTTGTAAATTTTAAAAAATGCTTTCTTTTAA  
TACTTTTTTGTATCTTATTCTAATAACTTTCCCTAATCTTTCTTTTTCAGGGCAATAATGATACAA  
TGTATCATGCCTCTTTGCACCTTCTAAAGAATAACAGTGATAATTTCTGGGTTAAGGCAATAGCA  
ATATTTCTGCATATAAATATTTCTGCATATAAATTGTAAGTGTGTAAGAGGTTTCATATTGCTAATA

GCAGCTACAATCCAGCTACCATTCTGCTTTTATTTTATGGTTGGGATAAGGCTGGATTATTCTGAG  
TCCAAGCTAGGCCCTTTTGCTAATCATGTTTCATACCTCTTATCTTCTCCACAGCTCCTGGGCAA  
CGTGCTGGTCTGTGTGCTGGCCATCACTTTGGCAAAGGCGGCCGC

### **Kappa light chain expression plasmid sequence>**

AGGACAGTTGCCGCCCTAGTGTGTTTCATCTTTCCGCCTTCAGACGAGCAGCTGAAGTCCGGTA  
CAGCTTCCGTGGTGTGCCTTCTAAATAATTTCTATCCGAGGGAAGCGAAGGTGCAGTGAAGGTG  
GATAATGCACTGCAAAGCGGCAACAGTCAGGAGTCCGTACAGAACAGGATAGCAAAGACTCCA  
CTTATAGTCTGTCCTCGACCCTTACACTATCCAAGGCCGACTACGAAAAACAAAAAGTCTACGCTT  
GCGAGGTGACCCACCAGGGTCTGAGCTCCCCTGTAACAAAGTCTTTCAACCGCGGAGAGTGCTA  
GTCTAGAAGTTGTCTCCTCCTGCACTGACTGACTGATAACAATCGATTTCTGGATCCGCAGGCCTA  
ATCAACCTCTGGATTACAAAATTTGTGAAAGATTGACTGGTATTCTTAACTATGTTGCTCCTTTTAC  
GCTATGTGGATACGCTGCTTTAATGCCTTTGTATCATGCTATTGCTTCCCGTATGGCTTTCAATTTT  
TCCTCCTTGTATAAATCCTGGTTGCTGTCTTTATGAGGAGTTGTGGCCCGTTGTCAGGCAACG  
TGGCGTGGTGTGCACTGTGTTTGTGCTGACGCAACCCCACTGGTTGGGGCATTGCCACCACCTGT  
CAGCTCCTTTCCGGGACTTTTCGCTTTCCCCCTCCCTATTGCCACGGCGGAACCTCATCGCCGCT  
GCCTTGCCCGCTGCTGGACAGGGGCTCGGCTGTTGGGCACTGACAATTCGTGGTGTGTCGG  
GGAAGCTGACGTCTTTCCATGGCTGCTCGCCTGTGTTGCCACCTGGATTCTGCGCGGGACGTC  
CTTCTGCTACGTCCCTTCGGCCCTCAATCCAGCGGACCTTCCCTCCCGCGGCCCTGCTGCCGGCT  
CTGCCGGCCTCTCCGCGTCTTCGCCTTCGCCCTCAGACGAGTCGGATCTCCCTTTGGGCCGCT  
CCCCGCTGTCTAGCTTGACTGACTGAGATACAGCGTACCTTCAGCTCACAGACATGATAAGATA  
CATTGATGAGTTTGGACAAACCACAACACTAGAATGCAGTGAATAAATGCTTTATTTGTGAAATTTG  
TGATGCTATTGCTTTATTTGTAACCATTATAAGCTGCAATAAACAAGTTAACAACAACAATTGCATT  
CATTTTATGTTTCAGGTTTCAGGGGGAGGTGTGGGAGGTTTTTAAAGCAAGTAAACCTCTACAAA  
TGTGGTATTGGCCCATCTCTATCGGTATCGTAGCATAACCCCTTGGGGCCTCTAAACGGGTCTTG  
AGGGGTTTTTTGTGCCCTCGGGCCGGATTGCTATCTACCGCATTGGCGCAGAAAAAATGCC  
TGATGCGACGCTGCGCGTCTTATACTCCACATATGCCAGATTCAGCAACGGATACGGCTTCCCC  
AACTTGCCCACTTCCATACGTGTCCTCCTTACCAGAAATTTATCCTTAAGGTGCTCAGCTATCCTG  
CAGGCGATCTCTCGATTTTCGATCAAGACATTCCTTTAATGGTCTTTTCTGGACACCACTAGGGGTC  
AGAAGTAGTTCATCAAACCTTCTCCCTCCCTAATCTCATTGGTTACCTTGGGCTATCGAACTTAA  
TTAAGCGATCTGCATCTCAATTAGTCAGCAACCATAGTCCCGCCCTAACTCCGCCCATCCCGCC  
CCTAACTCCGCCAGTTCCGCCATTCTCCGCCCATCGCTGACTAATTTTTTTATTTATGCAGA  
GGCCGAGGCCGCTCGGCCTCTGAGCTATTCCAGAAGTAGTGAGGAGGCTTTTTTGGAGGCCTA  
GGCTTTTCAAAGGAGGTAGCCAACATGATTGAACAAGATGGATTGCACGCAGGTTCTCCCGCC  
GCTTGGGTGGAGAGGCTATTCCGGCTATGACTGGGCACAACAGACAATCGGCTGCTCTGATGCCG  
CCGTGTTCCGGCTGTCAGCGCAGGGGCGCCCGTTCTTTTTGTCAAGACCGACCTGTCCGGTGC  
CCTGAATGAACTCCAGGACGAGGCAGCGCGGCTATCGTGGCTGGCCACGCGGGTTCCTTG  
CGCAGCTGTGCTCAGCTTGTCACTGAAGCGGGAAGGGACTGGCTGCTATTGGGCGAAGTGCC  
GGGGCAGGATCTCCTGTCATCTCACCTTGCTCCTGCCGAGAAAGTATCCATCATGGCTGATGCAA  
TGCGGCGGCTGCATACGCTTGATCCGGCTACCTGCCATTCCGACCACCAAGCGAAACATCGCAT  
CGAGCGAGCACGTACTCGGATGGAAGCCGGTCTTGTGATCAGGATGATCTGGACGAAGAGCAT  
CAGGGGCTCGCGCCAGCCGAACCTGTTCCGCCAGGCTCAAGGCGCGGATGCCCGACGGCGAGGA  
TCTCGTCTGACCCACGGCGATGCCTGCTTGCCGAATATCATGGTGGAAAATGGCCGCTTTTCTG  
GATTCATCGACTGTGGCCGGCTGGGTGTGGCGGACCGCTATCAGGACATAGCGTTGGCTACCC  
GTGATATTGCTGAAGAGCTTGGCGGCGAATGGGCTGACCGCTTCCCTCGTGCTTTACGGTATCGC  
CGCTCCCGATTTCGACGCGCATCGCCTTCTATCGCCTTCTTGACGAGTTCTTCTAGTATGTAAGCC  
CTGTGCCTTCTAGTTGCCAGCCATCTGTTGTTTGGCCCTCCCCGTCCTTCTTGACCCTGGAA  
GGTGCCACTCCCACTGTCTTTCCTAATAAAATGAGGAAATTGCATCGCATTGTCTGAGTAGGTG  
TCATTCTATTCTGGGGGGTGGGGTGGGGCAGGACAGCAAGGGGGAGGATTGGGAAGACAATAG  
CAGGCATGCTGGGGATGCGGTGGGCTCTATGGTTAATTAACCAGTCAAGTCAAGTCACTTGGCGA  
GATCGACTTGTCTGGGTTTTCGACTACGCTCAGAATTGCGTCAGTCAAGTTCGATCTGGTCTTGC  
TATTGCACCCGTTCTCCGATTACGAGTTTCATTTAAATCATGTGAGCAAAGGCCAGCAAAGGC  
CAGGAACCGTAAAAAGGCCGCGTTGCTGGCGTTTTTCCATAGGCTCCGCCCCCTGACGAGCAT  
CACAAAATCGACGCTCAAGTCAGAGGTGGCGAAACCCGACAGGACTATAAAGATACCAGGCGT  
TTCCCCCTGGAAGCTCCCTCGTGCGCTCTCCTGTTCCGACCCTGCCGCTTACCGGATACCTGTC

CGCCTTTCTCCCTTCGGGAAGCGTGGCGCTTTCTCATAGCTCACGCTGTAGGTATCTCAGTTCCG  
TGTAGGTCGTTCCGCTCCAAGCTGGGCTGTGTGCACGAACCCCGTTCCAGCCCGACCGCTGCG  
CCTTATCCGGTAAGTATCGTCTTGAGTCCAACCCGGTAAGACACGACTTATCGCCACTGGCAGCA  
GCCACTGGTAACAGGATTAGCAGAGCGAGGTATGTAGGCGGTGCTACAGAGTTCTTGAAGTGGT  
GGCCTAACTACGGCTACACTAGAAGAACAGTATTTGGTATCTGCGCTCTGCTGAAGCCAGTTACC  
TTCGGAAAAAGAGTTGGTAGCTCTTGATCCGGCAAACAACCACCGCTGGTAGCGGTGGTTTTTT  
TGTTTGCAAGCAGCAGATTACGCGCAGAAAAAAGGATCTCAAGAAGATCCTTTGATCTTTTCTAC  
GGGTCTGACGCTCAGTGGAACGAAAACACTCACGTTAAGGGATTTTGGTCATGAGATTATCAAAA  
GGATCTTACCTAGATCCTTTTAAATTAATAAATGAAGTTTTAAATCAATCTAAAGTATATATGAGTAA  
ACTTGGTCTGACAGTTACCAATGCTTAATCAGTGAGGCACCTATCTCAGCGATCTGTCTATTTTCGT  
TCATCCATAGTTGCATTTAAATTTCCGAACCTCCAAGGCCCTCGTCGGAAAAATCTTCAAACCTTT  
CGTCCGATCCATCTTGCAGGCTACCTCTCGAACGAACTATCGCAAGTCTCTTGGCCGGCCTTGC  
GCCTTGGCTATTGCTTGGCAGCGCCTATCGCCAGGTATTACTCCAATCCCGAATATCCGAGATCG  
GGATCACCCGAGAGAAGTTCAACCTACATCCTCAATCCCGATCTATCCGAGATCCGAGGAATATC  
GAAATCGGGGCGCGCCTGGTGTACCGAGAACGATCCTCTCAGTGCGAGTCTCGACGATCCATAT  
CGTTGCTTGGCAGTCAGCCAGTCGGAATCCAGCTTGGGACCCAGGAAGTCCAATCGTCAGATAT  
TGTAATCAAGCCTGGTCACGGCAGCGTACCGATCTGTTTAAACCTAGATATTGATAGTCTGATCG  
GTCAACGTATAATCGAGTCCTAGCTTTTCAAACATCTATCAAGAGACAGGATCAGCAGGAGGCT  
TTCGCATGAGTATTCAACATTTCCGTGTCGCCCTTATTCCCTTTTTTGCGGCATTTTGCCTTCTGT  
TTTTGCTCACCCAGAAACGCTGGTGAAGTAAAAGATGCTGAAGATCAGTTGGGTGCGCGAGTG  
GGTTACATCGAACTGGATCTCAACAGCGGTAAGATCCTTGAGAGTTTTCGCCCCGAAGAACGCTT  
TCCAATGATGAGCACTTTTAAAGTTCTGCTATGTGGCGCGGTATTATCCCGTATTGACGCCGGGC  
AAGAGCAACTCGGTGCGCGCATACTATTCTCAGAATGACTTGGTTGAGTATTACCAGTCACA  
GAAAAGCATCTTACGGATGGCATGACAGTAAGAGAATTATGCAGTGCTGCCATAACCATGAGTGA  
TAACACTGCGGCCAACTTACTTCTGACAACGATTGGAGGACCGAAGGAGCTAACCGCTTTTTTGC  
ACAACATGGGGGATCATGTAACCTCGCCTTGATCGTTGGGAACCGGAGCTGAATGAAGCCATACC  
AAACGACGAGCGTGACACCACGATGCCTGTAGCAATGGCAACAACCTTGCCTAACTATTAAGTGC  
GCGAACTACTTACTCTAGCTTCCCGGCAACAGTTGATAGACTGGATGGAGGCGGATAAAGTTGCA  
GGACCACTTCTGCGCTCGGCCCTTCCGGCTGGCTGGTTTATTGCTGATAAATCTGGAGCCGGTG  
AGCGTGGGTCTCGCGGTATCATTGCAGCACTGGGGCCAGATGGTAAGCCCTCCCGTATCGTAGT  
TATCTACACGACGGGGAGTCAGGCAACTATGGATGAACGAAATAGACAGATCGCTGAGATAGT  
GCCTCACTGATTAAGCATTGGTAACCGATTCTAGGTGCATTGGCGCAGAAAAAATGCCTGATGC  
GACGCTGCGCGTCTTATACTCCACATATGCCAGATTGAGCAACGGATACGGCTTCCCAACTTG  
CCCATTCCATACGTGTCCTCCTTACCAGAAATTTATCCTTAAAGATCGTTTAAACTCGACTTGGC  
TCTATCGAATCTCCGTTTCGAGCTTACGCGAACAGCCGTGGCGCTCATTGCTCGTCCGGGCA  
TCGAATCTCGTCAGCTATCGTCAGCTTACCTTTTTGGCAGCGATCGCGGCTCCCGACATCTTGA  
CCATTAGCTCCACAGGTATCTTCTTCCCTCTAGTGGTCATAACAGCAGCTTACGCTACCTCTCAAT  
TCAAAAAACCCCTCAAGACCCGTTTAGAGGCCCAAGGGGTTATGCTATCAATCGTTGCGTTACA  
CACAAAAAACCAACACACATCCATCTTCGATGGATAGCGATTTTATTATCTAACTGCTGATCGA  
GTGTAGCCAGATCTAGTAATCAATTACGGGGTCAATTAGTTTCATAGCCCATATATGGAGTTCCGCG  
TTACATAACTTACGGTAAATGGCCCGCCTGGCTGACCGCCCAACGACCCCGCCATTGACGTC  
AATAATGACGTATGTTCCCATAGTAACGCCAATAGGGACTTTCCATTGACGTCAATGGGTGGAGT  
ATTTACGGTAAACTGCCACTTGGCAGTACATCAAGTGTATCATATGCCAAGTACGCCCCCTATTG  
ACGTCAATGACGGTAAATGGCCCGCCTGGCATTATGCCAGTACATGACCTTATGGGACTTTTCT  
ACTTGGCAGTACATCTACGTATTAGTCATCGCTATTACCATGCTGATGCGGTTTTGGCAGTACATC  
AATGGGCGTGGATAGCGGTTTACTCACGGGGATTTCCAAGTCTCCACCCCATGACGTCAATG  
GGAGTTTTTTTTGGCACAAAATCAACGGGACTTTCAAATGTGTAACAACCTCCGCCCATTTG  
ACGCAATGGGCGGTAGGCGGTACGGTGGGAGGTCTATATAAGCAGAGCTGGTTTATGTAACC  
GTCAGATCGCCTGGAGACGCCATCCACGCTTTTTGACCTCCATAGAAGACACCGGGACCGATC  
CAGCCTCCCCTCGAAGCTTACATGTGGTACCGAGCTCGGATCCTGAGAACTTACGGGTGAGTCT  
ATGGGACCTTGATGTTTTCTTCCCTTCTTTCTATGGTTAAGTTCATGTCATAGGAAGGGGAG  
AAGTAACAGGGTACACATATTGACCAAATCAGGGTAATTTTGCATTTGTAATTTTAAAAATGCTTT  
CTTCTTTTAAATACTTTTTTGTATCTTATTTCTAATACTTTCCCTAATCTCTTCTTTTACGGGCAA  
TAATGATACAATGTATCATGCCTCTTTCACCACTTCTAAAGAATAACAGTGATAATTTCTGGGTTAA  
GGCAATAGCAATATTTCTGCATATAAATATTTCTGCATATAAATTTGTAACCTGATGTAAGAGGTTTCA  
TATTGCTAATAGCAGCTACAATCCAGCTACCATTCTGCTTTTATTTTATGGTTGGGATAAAGGCTGG  
ATTATTCTGAGTCCAAGCTAGGCCCTTTTGTAAATCATGTTTACATACCTTATCTTCTTCCCACAG  
CTCCTGGGCAACGTGCTGGTCTGTGTGCTGGCCCATCACTTTGGCAAAGGCGGCGC

## Abvec IgG3 heavy chain plasmid backbone vector>

GCTAGCACCAAGGGCCCATCGGTCTTCCCCTGGCGCCCTGCTCCAGGAGCACCTCTGGGGGCACA  
GCGGCCCTGGGCTGCCTGGTCAAGGACTACTTCCCCGAACCGGTGACGGTGTCTGGAACCTCAGGC  
GCCCTGACCAGCGGGCTGCACACCTTCCCGGCTGTCTACAGTCCTCAGGACTCTACTCCCTCAGCA  
GCGTGGTGACCGTGCCCTCCAGCAGCTTGGGCACCCAGACCTACACCTGCAACGTGAATCACAAGCC  
CAGCAACACCAAGGTGGACAAGAGAGTTGAGCTCAAAAACCCCACTTGGTGACACAACCTCACACATGCC  
CACGGTGCCAGAGCCCAAATCTTGTGACACACCTCCCCCGTGCCACGGTGCCAGAGCCCAAATC  
TTGTGACACACCTCCCCATGCCACGGTGCCAGAGCCCAAATCTTGTGACACACCTCCCCATGCC  
CACGGTGCCAGCACCTGAACTCCTGGGAGGACCGTCAGTCTTCTTCCCCCAAACCCAAGGAT  
ACCTTATGATTTCCCGGACCCCTGAGGTACGTGCGTGGTGGTGGACGTGAGCCACGAAGACCCCG  
AGGTCCAGTTCAAGTGGTACGTGGACGGCGTGGAGGTGCATAATGCCAAGACAAAGCCGCGGGAGGA  
GCAGTTCAACAGCACGTTCCGTGTGGTCAGCGTCCTCACCGTCCTGCACCAGGACTGGCTGAACGGC  
AAGGAGTACAAGTGCAAGGTCTCCAACAAAGCCCTCCCAGCCCCATCGAGAAAACCATCTCCAAAAC  
CAAAGGACAGCCCCGAGAACCACAGGTGTACACCCTGCCCCATCCCGGGAGGAGATGACCAAGAAC  
CAGGTCAGCCTGACCTGCCTGGTCAAAGGCTTCTACCCAGCGACATCGCCGTGGAGTGGGAGAGCA  
GCGGGCAGCCGGAGAACAACACTACAACACCACGCCTCCCATGCTGGACTCCGACGGCTCCTTCTTCT  
CTACAGCAAGCTCACCGTGGACAAGAGCAGGTGGCAGCAGGGGAACATCTTCTCATGCTCCGTGATG  
CATGAGGCTCTGCACAACCGCTTCACGCAGAAGAGCCTCTCCCTGTCTCCGGGTAAATGAGCTTGGCC  
GCCATGGCCCAACTTGTATTGTCAGCTTATAATGGTTACAAATAAAGCAATAGCATCACAATTTTACA  
AATAAAGCATTTTTTCACTGCATTCTAGTTGTGGTTTTGTCCAAACTCATCAATGTATCTTATCATGTCTG  
GATCGATCGGGAATTAATTCCGGCGCAGCACCATGGCCTGAAATAACCTCTGAAAGAGGAACTTGGTTA  
GGTACCTTCTGAGGCGGAAAGAACCAGCTGTGGAATGTGTGTCAGTTAGGGTGTGGAAAGTCCCCAG  
GCTCCCCAGCAGGCAGAAGTATGCAAAGCATGCATCTCAATTAGTCAGCAACCAGGTGTGGAAAGTCC  
CCAGGCTCCCCAGCAGGCAGAAGTATGCAAAGCATGCATCTCAATTAGTCAGCAACCATAGTCCCGCC  
CCTAACTCCGCCATCCCGCCCCTAACTCCGCCAGTTCGCCCATCTCCGCCCATGGCTGACTAA  
TTTTTTTTATTTATGCAGAGGCCGAGGCCCTCGGCCTCTGAGCTATTCCAGAAGTAGTGAGGAGGC  
TTTTTTGGAGGCCTAGGCTTTTGCAAAAAGCTGTAAACAGCTTGGCACTGGCCGTCGTTTTACAACGTC  
GTGACTGGGAAAACCCTGGCGTTACCCAACCTAATCGCCTTGCAGCACATCCCCCCTTCGCCAGCTGG  
CGTAATAGCGAAGAGGCCCGCACCGATCGCCCTTCCCAACAGTTGCGTAGCCTGAATGGCGAATGGC  
GCCTGATGCGGTATTTTCTCCTTACGCATCTGTGCGGTATTTACACCCGCATACGTCAAAGCAACCATA  
GTACGCGCCCTGTAGCGGCGCATTAAAGCGCGGCGGGTGTGGTGGTTACGCGCAGCGTGACCGCTAC  
ACTTGCCAGCGCCCTAGCGCCCGCTCCTTTCGTTTTCTTCCCTCCTTTCTCGCCACGTTCCGCCGCT  
TTCCCGTCAAGCTCTAAATCGGGGGCTCCCTTTAGGGTCCGATTTAGTGCTTTACGGCACCTCGAC  
CCCAAAAACCTTGATTTGGGTGATGGTTCACGTAGTGGCCATCGCCCTGATAGACGGTTTTTCGCC  
TTTGACGTTGGAGTCCACGTTCTTTAATAGTGGACTCTTGTCCAAACTGGAACAACACTCAACCCTAT  
CTCGGGCTATTCTTTGATTTATAAGGGATTTTGCCGATTTCCGCCTATTGGTTAAAAAATGAGCTGATT  
TAACAAAAATTTAACGCGAATTTTAACAAAATATTAACGTTTACAATTTTATGGTGCACCTCTCAGTACAAT  
CTGCTCTGATGCCGCATAGTTAAGCCAACCTCCGCTATCGCTACGTGACTGGGTGATGGCTGCGCCCCG  
ACACCCGCCAACACCCGCTGACGCGCCCTGACGGGCTTGTCTGCTCCCGGCATCCGCTTACAGACAA  
GCTGTGACCGTCTCCGGGAGCTGCATGTGTGAGAGTTTTACCGTCATCACCGAAACGCGCGAGGC  
AGTATTCTTGAAGACGAAAGGGCCTCGTGATACGCTATTTTTATAGGTTAATGTCATGATAATAATGGT  
TTCTTAGACGTCAGGTGGCACTTTTCGGGGAAATGTGCGCGGAACCCCTATTTGTTATTTTTCTAATA  
CATTCAAATATGTATCCGCTCATGAGACAATAACCCTGATAAATGCTTCAATAATATTGAAAAAGGAAGA  
GTATGAGTATTCAACATTTCCGTGTGCGCCTTATTCCCTTTTTTTCGCGCATTTTGCCTTCTGTTTTGC  
TCACCCAGAAACGCTGGTGAAGTAAAAGATGCTGAAGATCAGTTGGGTGCACGAGTGGGTTACATCG  
AACTGGATCTCAACAGCGGTAAGATCCTTGAGAGTTTTTCGCCCGAAGAACGTTTTCCAATGATGAGCA  
CTTTTAAAGTTCTGCTATGTGGCGCGGTATTATCCCGTATGACGCCGGGCAAGAGCAACTCGGTCGC  
CGCATACACTATTCTCAGAATGACTTGGTTGAGTACTACCAGTCACAGAAAAGCATCTTACGGATGGC

ATGACAGTAAGAGAATTATGCAGTGCTGCCATAACCATGAGTGATAAACTGCGGCCAACTTACTTCTG  
ACAACGATCGGAGGACCGAAGGAGCTAACCGCTTTTTTGCACAACATGGGGGATCATGTAACCTCGCCT  
TGATCGTTGGGAACCGGAGCTGAATGAAGCCATACCAAACGACGAGCGTGACACCACGATGCCAGCA  
GCAATGGCAACAACGTTGCGCAAATACTGCGCAACTACTTACTCTAGCTTCCCGGCAACAATTA  
ATAGACTGGATGGAGGCGGATAAAGTTGCAGGACCACTTCTGCGCTCGGCCCTCCCGGCTGGCTGGT  
TTATTGCTGATAAATCTGGAGCCGGTGAGCGTGGGTCTCGCGGTATCATTGCAGCACTGGGGCCAGAT  
GGTAAGCCCTCCCGTATCGTAGTTATCTACACGACGGGGAGTCAGGCAACTATGGATGAACGAAATAG  
ACAGATCGCTGAGATAGGTGCCTCACTGATTAAGCATTGGTAACTGTCAGACCAAGTTTACTCATATAT  
ACTTTAGATTGATTTAAACTTCATTTTTAATTTAAAGGATCTAGGTGAAGATCCTTTTTGATAATCTCAT  
GACCAAAATCCCTTAACGTGAGTTTTCGTTCCACTGAGCGTCAGACCCCGTAGAAAAGATCAAAGGATC  
TTCTTGAGATCCTTTTTTCTGCGCGTAATCTGCTGCTTGCAAACAAAAAACCCAGCCTACCAGCGGT  
GGTTTGTGGCCGGATCAAGAGCTACCAACTCTTTTTCCGAAGGTAAGTGGCTTCCAGCAGAGCGCAGA  
TACCAAATACTGTCCTTCTAGTGTAGCCGTAGTTAGGCCACCACTTCAAGAACTCTGTAGCACCCGCTA  
CATACCTCGCTCTGCTAATCCTGTTACCAGTGGCTGCTGCCAGTGGCGATAAGTCGTGTCTTACCGGG  
TTGGACTCAAGACGATAGTTACCGGATAAGGCGCAGCGGTGCGGGCTGAACGGGGGGTTCGTGCACAC  
AGCCCAGCTTGGAGCGAACGACCTACACCGAACTGAGATACCTACAGCGTGAGCATTGAGAAAGCGC  
CACGCTTCCCGAAGGGAGAAAGGCGGACAGGTATCCGGTAAGCGGCAGGGTCGGAACAGGAGAGCG  
CACGAGGGAGCTTCCAGGGGGAAACGCCTGGTATCTTTATAGTCCTGTGCGGGTTTCGCCACCTCTGAC  
TTGAGCGTCGATTTTTGTGATGCTCGTCAGGGGGGCGGAGCCTATGGAAAACGCCAGCAACGCGGC  
CTTTTTACGGTTCCTGGCCTTTTGCTGGCCTTTTGCTCACATGTTCTTTTCTGCGTTATCCCCTGATTCT  
GTGGATAACCGTATTACCGCCTTTGAGTGAGCTGATACCGCTCGCCGCAGCCGAACGACCGAGCGCA  
GCGAGTCAGTGAGCGAGGAAGCGGAAGAGCGCCCAATACGCAAACCGCCTCTCCCCGCGCGTTGGC  
CGATTCATTAATCCAGCTGGCACGACAGGTTTCCCGACTGGAAAGCGGGCAGTGAGCGCAACGCAATT  
AATGTGAGTTACCTCACTCATTAGGCACCCAGGCTTACACTTTATGCTTCCGGCTCGTATGTTGTGT  
GGAATTGTGAGCGGATAACAATTTACACAGGAAACAGCTATGACCATGATTACGAATTAATTCGAGCT  
CGCCCAGCATTGATTATTGACTAGTTATTAATAGTAATCAATTACGGGGTCATTAGTTCATAGCCCATAT  
ATGGAGTTCCGCGTTACATAACTTACGGTAAATGGCCCGCCTGGCTGACCGCCCAACGACCCCCGCC  
CATTGACGTCAATAATGACGTATGTTCCCATAGTAACGCCAATAGGGACTTTCCATTGACGTCAATGGG  
TGGAGTATTTACGGTAAACTGCCCACTTGGCAGTACATCAAGTGATCATATGCCAAGTACGCCCCCTA  
TTGACGTCAATGACGGTAAATGGCCCGCCTGGCATTATGCCCAGTACATGACCTTATGGGACTTTCCCTA  
CTTGGCAGTACATCTACGTATTAGTCATCGCTATTACCATGGTGATGCGGTTTTGGCAGTACATCAATG  
GGCGTGGATAGCGGTTTGACTCACGGGGATTTCCAAGTCTCCACCCCATGACGTCAATGGGAGTTTG  
TTTTGGCACAAAATCAACGGGACTTTCCAAAATGTGCTAACAACTCCGCCCCATTGACGCAAAATGGGC  
GGTAGGCGTGTACGGTGGGAGGTCTATATAAGCAGAGCTCGTTTGTGTAACCGTCAGATCGCCTGGA  
GACGCCATCCACGCTGTTTTGACCTCCATAGAAGACACCGGGACCGATCCAGCCTCCGCGGCCGGGA  
ACGGTGCATTGGAACGCGGATTCCCGTGCCAAGAGTGACGTAAGTACCGCCTATAGAGTCTATAGGC  
CCACCCCTTGGCTTCGTTAGAACGCGGCTACAATTAATACATAACCTTATGTATCATACACATACGATT  
TAGGTGACACTATAGAATAACATCCACTTTGCCTTTCTCTCCACAGGTGTCCACTCCAGGTCCAACCTG  
CACCTCGGTTCTATCGATTGAATCCACCATGGGATGGTCATGTATCATCCTTTTTCTAGTAGCAACCG  
GTGTACATTCT
